# Supplementary material
Source: PubMed Central journal article supplement (PMC7364310)
Supplement: Supp_TableS1-S2.pdf [file Supp_TableS1-S2.pdf]

## Supplementary Data

SUPPLEMENTARY TABLE S1. CORRELATION BETWEEN SOCIAL PROVISIONS SCALE SUBSCALES

|             | <i>Attachment</i> | <i>Worth</i> | <i>Integration</i> | <i>Alliance</i> | <i>Guidance</i> | <i>Nurturance</i> |
|-------------|-------------------|--------------|--------------------|-----------------|-----------------|-------------------|
| Attachment  | 1.00              |              |                    |                 |                 |                   |
| Worth       | 0.43              | 1.00         |                    |                 |                 |                   |
| Integration | 0.73              | 0.47         | 1.00               |                 |                 |                   |
| Alliance    | 0.80              | 0.48         | 0.66               | 1.00            |                 |                   |
| Guidance    | 0.75              | 0.57         | 0.66               | 0.74            | 1.00            |                   |
| Nurturance  | 0.51              | 0.37         | 0.47               | 0.51            | 0.47            | 1.00              |

SUPPLEMENTARY TABLE S2. BACKWARD ELIMINATION ANALYSIS: ASSOCIATION BETWEEN SOCIAL SUPPORT SUBSCALES AND ANXIETY, ACCOUNTING FOR COVARIATES (FINAL MODEL)

| <i>Subscales</i> | <i>Baseline</i> |           |                           | <i>12 Months</i> |           |                         | <i>24 Months</i> |           |                          |
|------------------|-----------------|-----------|---------------------------|------------------|-----------|-------------------------|------------------|-----------|--------------------------|
|                  | <i>Beta</i>     | <i>SE</i> | <i>p-Value (95% CI)</i>   | <i>Beta</i>      | <i>SE</i> | <i>p-Value (95% CI)</i> | <i>Beta</i>      | <i>SE</i> | <i>p-Value (95% CI)</i>  |
| Attachment       | NA              | NA        | NA                        | 0.44             | 0.23      | 0.06 (−0.02 to 0.90)    | NA               | NA        | NA                       |
| Worth            | NA              | NA        | NA                        | −0.47            | 0.18      | 0.02 (−0.84 to −0.11)   | NA               | NA        | NA                       |
| Integration      | −0.81           | 0.17      | <0.01<br>(−1.14 to −0.48) | −0.80            | 0.32      | 0.02 (−1.40 to −0.15)   | −0.46            | 0.22      | 0.04<br>(−0.89 to −0.03) |
| Guidance         | NA              | NA        | NA                        | NA               | NA        | NA                      | NA               | NA        | NA                       |
| Alliance         | NA              | NA        | NA                        | NA               | NA        | NA                      | −0.32            | 0.20      | 0.11<br>(−0.72 to 0.08)  |
| Nurturance       | NA              | NA        | NA                        | NA               | NA        | NA                      | NA               | NA        | NA                       |

Parent type (mother, father, other), parent education, child's perceived health status. NA means exceeded 0.2 criterion.  
CI, confidence interval; SE, standard error.
